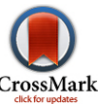

# Direct Reprogramming of Huntington's Disease Patient Fibroblasts into Neuron-Like Cells Leads to Abnormal Neurite Outgrowth, Increased Cell Death, and Aggregate Formation

Yanying Liu<sup>1</sup>, Yuanchao Xue<sup>2</sup>, Samantha Ridley<sup>1</sup>, Dong Zhang<sup>1</sup>, Khosrow Rezvani<sup>1</sup>, Xiang-Dong Fu<sup>2</sup>, Hongmin Wang<sup>1\*</sup>

**1** Division of Basic Biomedical Sciences, University of South Dakota Sanford School of Medicine, Vermillion, South Dakota, United States of America, **2** Department of Cellular and Molecular Medicine, University of California San Diego, The Palade Laboratories Room 231, La Jolla, California, United States of America

## Abstract

Recent advances in trans-differentiation of one type cell to another have made it possible to directly convert Huntington's disease (HD) patient fibroblasts into neurons by modulation of cell-lineage-specific transcription factors or RNA processing. However, this possibility has not been examined. Here, we demonstrate that HD patient-derived fibroblasts can be directly trans-differentiated into neuron-like cells by knockdown of the expression of a single gene encoding the polypyrimidine-tract-binding protein. The directly converted HD neuron-like cells were positive in expression of Tuj1, NeuN, DARPP-32, and  $\gamma$ -aminobutyric acid and exhibited neuritic breakdown, abnormal neuritic branching, increased cell death, and aggregation of mutant huntingtin. These observations indicate that the neuron-like cells directly converted from HD patient fibroblasts recapitulate the major aspects of neuropathological characteristics of HD and thus provide an additional model for understanding the disorder and validation of therapeutic reagents.

**Citation:** Liu Y, Xue Y, Ridley S, Zhang D, Rezvani K, et al. (2014) Direct Reprogramming of Huntington's Disease Patient Fibroblasts into Neuron-Like Cells Leads to Abnormal Neurite Outgrowth, Increased Cell Death, and Aggregate Formation. PLoS ONE 9(10): e109621. doi:10.1371/journal.pone.0109621

**Editor:** Wanli Smith, University of Maryland School of Pharmacy, United States of America

**Received:** February 14, 2014; **Accepted:** September 11, 2014; **Published:** October 2, 2014

**Copyright:** © 2014 Liu et al. This is an open-access article distributed under the terms of the Creative Commons Attribution License, which permits unrestricted use, distribution, and reproduction in any medium, provided the original author and source are credited.

**Funding:** This work was supported by Start-up Funds from the University of South Dakota. HW was supported in part by the NIH grant 1R15NS071459-01A1. The funders had no role in study design, data collection and analysis, decision to publish, or preparation of the manuscript.

**Competing Interests:** The authors have declared that no competing interests exist.

\* Email: Hongmin.Wang@usd.edu

## Introduction

Huntington's disease (HD) is a progressive neurodegenerative disorder caused by expansion of polyglutamine (polyQ) repeats in the N-terminus of the huntingtin (Htt) protein [1,2]. The disease is neuropathologically characterized by neuronal loss in the striatum and cortex and formation of protein aggregates (inclusions), resulting in motor and behavioral dysfunction [3]. To understand the pathogenesis of HD, a number of HD cell models have been created and applied in many studies over the last two decades [4,5]. Although these HD cells exhibit at least some of the pathological features of HD, most of them do not express full-length human mutant Htt and neuronal markers and thus are not ideal for modeling HD. Induced pluripotent stem cells from HD patient or animal fibroblasts provide a new model for studying HD [6–9]. However, the neuronal induction process is usually time-consuming and tedious. Recently, trans-differentiation of one type cell to another has been made it possible to directly convert HD patient fibroblasts into neuron-like cells by modulation of cell-lineage-specific transcription factors or RNA processing [10–12]. However, it remains unknown whether HD patient-derived fibroblasts can be directly reprogrammed into the neuron-like cells that reproduce the major aspect of HD pathological features.

The polypyrimidine-tract-binding (PTB) is an RNA-binding protein that regulates RNA splicing, stability, and localization

[13]. During neuronal differentiation, the expression of PTB is switched to its neuronal homolog, nPTB [14]. Forced expression of PTB blocks neuronal differentiation [15], whereas knockdown of PTB expression by PTB-RNA interactions dramatically promotes conversion of diverse cell types into neurons [12,16]. Here, we demonstrate that following PTB knockdown, HD patient-derived fibroblasts can be directly reprogrammed to neuron-like cells that exhibit the major HD pathological characteristics.

## Materials and Methods

### Ethics statement

The following cell lines were obtained from the NIGMS Human Genetic Cell Repository at the Coriell Institute for Medical Research: AG07095, GM04281, and GM05539. The Coriell Institute and ATCC maintain the written consent forms and privacy of the donors of the fibroblast samples, and the authors had no contact or interaction with the donors. All human fibroblast cells and protocols in the present study were carried out in accordance with the guidelines approved by the University of South Dakota Institutional Review Board.

### Cell culture, preparation and infection of PTB1 small-hairpin (sh) RNA lentiviral particles

Human fibroblasts were maintained in DMEM supplemented with 10% defined FBS, non-essential amino acids, Glutamax,  $\beta$ -mercaptoethanol and 100 ng/mL bFGF at 37°C, 5% CO<sub>2</sub>. The CAG repeat number information in the htt gene was obtained from Coriell and confirmed by PCR using a PCR kit (Genelink).

Preparation of lentiviral particles of the shRNAs against human PTB1 and infection of fibroblasts were performed as previously described [12]. Sixteen hours after the shRNA treatment, the cells were selected either with 2  $\mu$ g/ml puromycin or 100 ng/ $\mu$ l of hygromycin B for 48 h. Selected cells were switched into N3 medium (DMEM/F12, 25  $\mu$ g/ml insulin, 50  $\mu$ g/ml human transferrin, 30 nM sodium selenite, 20 nM progesterone, and 100 nM putrescine) supplemented with FGF2 (10 ng/ml) for 3 days and then switched to N3 medium for 10 days. Finally, cells were maintained in N3 medium supplemented with BDNF, GDNF, NT3 and CNTF as previously described [12] until being used for different analyses.

### Immunocytochemistry and fluorescence and confocal microscopy

Immunocytochemical staining was performed according to our previously described method [17]. Primary antibodies used include anti-Tuj1 (1:100, Millipore), anti-NeuN (1:100, Millipore), anti-gamma aminobutyric acid (GABA) (1:1000, Millipore), anti-DARPP-32 (1:50, Santa Cruz Biotechnology), and Htt EM48 (1:100, Millipore). Nuclei were stained with Hoechst 33342 (Life Technologies) as previously described [18,19]. Images were acquired with a Carl Zeiss fluorescence microscope equipped

with the AxioCam HRM ZEISS camera and AxioVision software. For cells stained with Htt EM48 antibody, images were captured with an Olympus confocal laser scanning microscope equipped with an argon laser and two HeNe lasers and FluoView 1000 software.

### Cell counting

If a Tuj1-positive cell had lost all neurites or showed neurite breakdown, the cell would be treated as a cell with neuritic degeneration. Tuj1-positive cells with less than 20  $\mu$ m in length of neurites or showing apparent thin neurites were regarded as cells with abnormal neuritic branching. GABA-positive cells with neurite breakdown and/or shrunken nuclei/cell bodies were counted as degenerated cells. If a cell had a nucleus containing one or more Htt aggregates, the cell would be counted as the positive for nuclear inclusion. If a cell contains aggregate(s) in the non-nuclear soma region or inside a neurite, the cell would be counted as the positive for non-nuclear (soma/neuropil) aggregate. At least 50 cells were counted in each experiment group and three independent experiments were performed.

### Detection of apoptotic cells

Apoptotic cell death was examined as previously described [20] by utilizing a TUNEL (terminal deoxynucleotidyl transferase dUTP nick end labeling, TUNEL) based apoptosis detection kit (Millipore). Stained cells were observed with a fluorescence microscope. Apoptotic cell rate was calculated as follows: apoptotic (or TUNEL positively stained cell) rate (%) = number of TUNEL positively stained cells/number of total cells (assessed by Hoechst 33342 staining)  $\times$  100%.

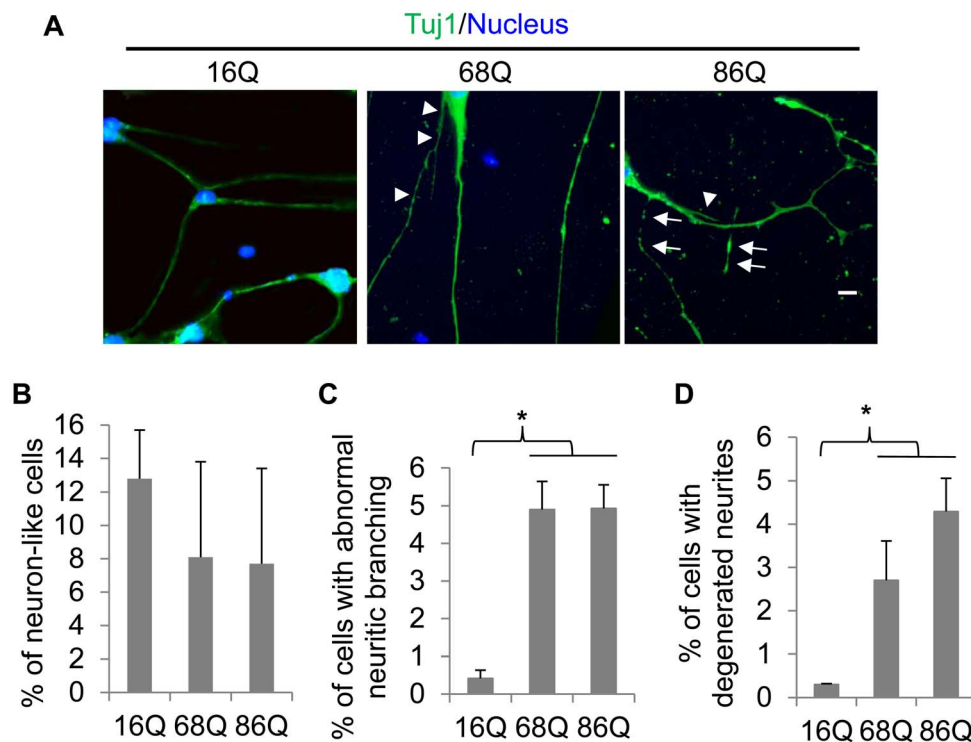

**Figure 1. Direct conversion of HD patient fibroblasts into neuron-like cells.** Human fibroblasts derived from a normal individual (16Q) or HD patients (68Q and 86Q) were infected with lentiviral shRNAs against human PTB. Nineteen days following the treatment, cells were used for analyses. (A) Immunostaining of the trans-differentiated cells with a neuron-specific marker, Tuj1, antibody. Arrow heads indicate thin or short neurites and arrows show broken neurites. Scale bar, 10  $\mu$ m. Cell counting results showing the percentage of cells with neuron-like morphology positive in Tuj1 staining (B), with abnormal neurites (C), or with degenerated (breakdown) neurites (D). Data are shown as mean  $\pm$  SD; n = 3. \*p < 0.05. doi:10.1371/journal.pone.0109621.g001

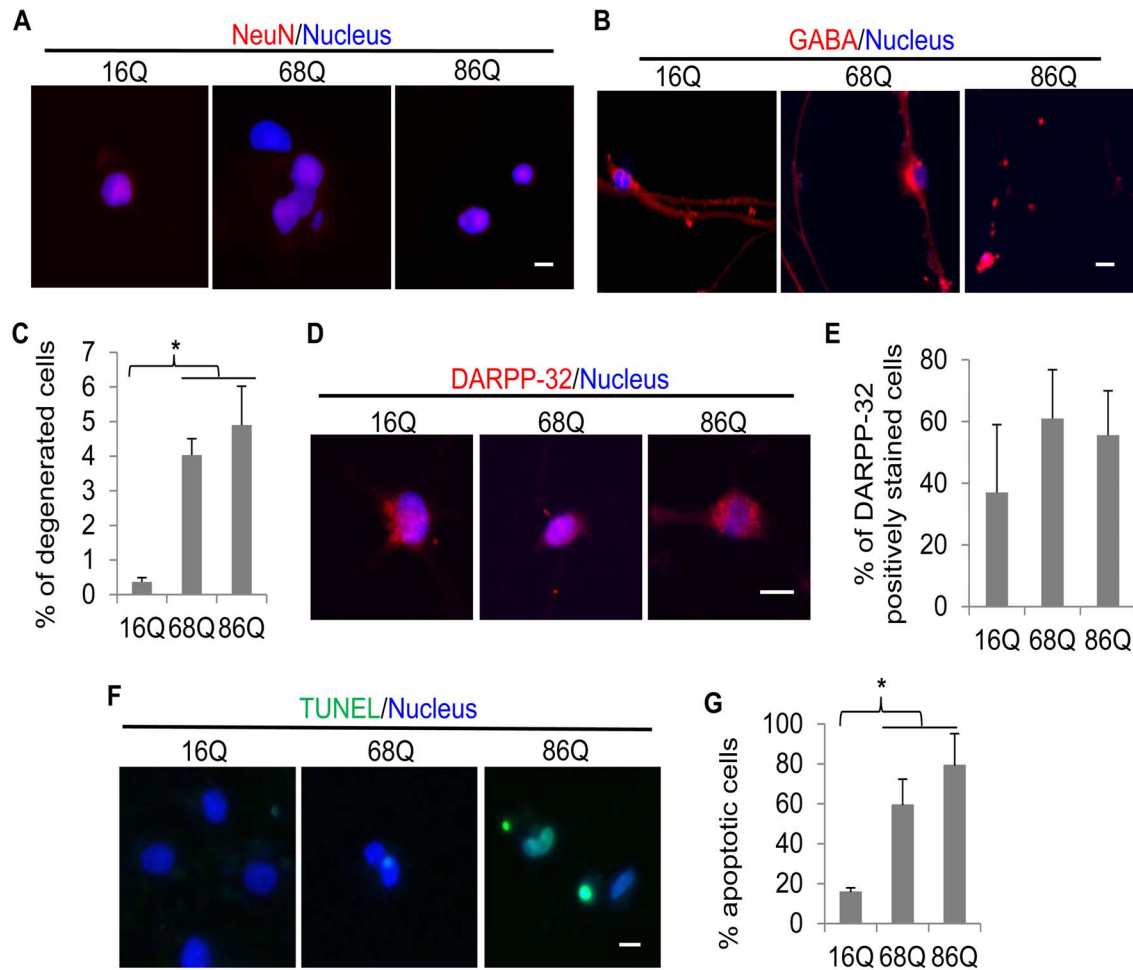

**Figure 2. The directly converted HD neuron-like cells are positive in NeuN, GABA, and DARPP-32 expressions and show progressive cell death.** Immunostaining of the trans-differentiated cells with a NeuN (A) or GABA (B) antibody at nineteen days following PTB knockdown. Scale bar, 10  $\mu$ m. (C) Quantification results showing the percentage of degenerated GABA-positive cells derived from the three types of fibroblasts at nineteen days. (D) Immunostaining of the trans-differentiated cells with a DARPP-32 antibody at thirty days. Scale bar, 10  $\mu$ m. (E) Graph showing the percentage of DARPP-32 positive cells at thirty days following PTB knockdown. (F) TUNEL staining of the converted cells at thirty days following the reprogramming. Scale bar, 10  $\mu$ m. (G) Graph showing the percentage of apoptotic cells assessed by TUNEL staining shown in (F). All quantitative data are shown as mean  $\pm$  SD; n=3 for each group of cells. \*p<0.001. doi:10.1371/journal.pone.0109621.g002

### Statistical analysis

Statistical comparisons between two groups were evaluated using two-tailed student's t test. P<0.05 was regarded as statistically significant.

### Results and Discussion

To reprogram the fibroblasts derived from HD patients into neuron-like cells, we employed a recently described method to knock down PTB protein [12] by infecting HD patient fibroblasts expressing Htt containing either 16Q, 68Q, or 86Q with lentiviral shRNAs against human PTB. Nineteen days following PTB knockdown, the cells exhibited a typical neuron-like morphology and showed positive immunoreactivity with Tuj1, a neuron-specific cytoskeleton protein present in newly generated immature postmitotic neurons and differentiated neurons [20,21] (Fig. 1A). Cell counting showed that the HD patient-derived fibroblasts did not significantly differ from the normal fibroblasts in the capability of conversion to Tuj1-positive neuron-like cells (Fig. 1B). Those undifferentiated cells did not show Tuj1 staining and only showed

the nuclear staining (Fig. 1A). The Tuj1-positive cells converted from HD patients (referred to as 68Q and 86Q, respectively) showed different neuritic morphology from the cells derived from a normal individual (16Q). The normal fibroblast-converted cells extended from one to several relatively thick neurites directly from the cell body (Fig. 1A, left panel). In addition to the thick neurites, however, the HD fibroblasts-derived cells frequently grew out thin neurites either directly from their cell bodies or from thick neurites (Figs. 1A, middle and right panels, pointed by arrow heads). Interestingly, some of the neurites derived from HD neuron-like cells were broken down and degenerated into small fragments positive in Tuj1 staining (Fig. 1A, pointed by arrows). Additionally, cell counting results indicated that more HD neuron-like cells (68Q and 86Q) exhibited abnormal neuritic branching (Fig. 1C) and neuritic breakdown (Fig. 1D) than the wild-type of neuron-like cells (16Q). These results indicate that the trans-differentiation of HD patient's fibroblasts into neuron-like cells leads to abnormal neuritic branching and degeneration.

As the neuronal nuclear antigen (NeuN) is a nuclear protein widely expressed in the mature postmitotic neurons, it has been

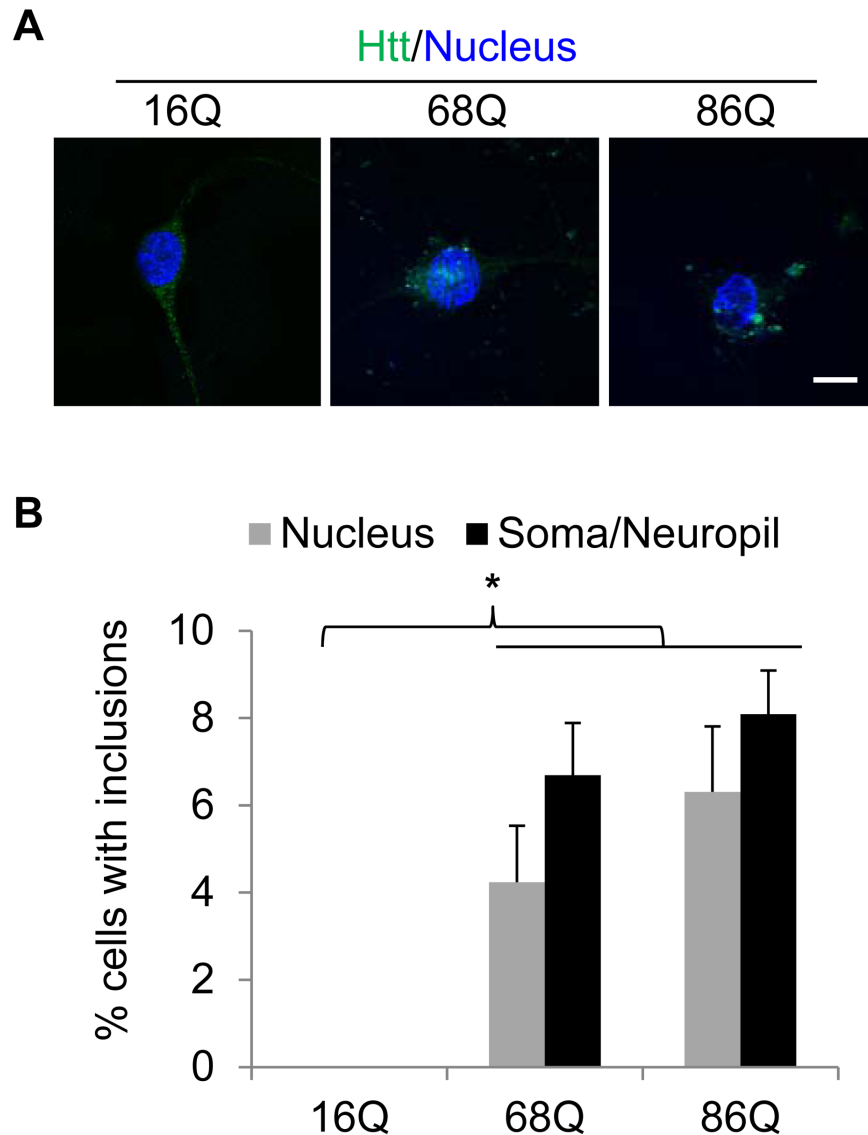

**Figure 3. The directly converted HD neuron-like cells show Htt inclusions at nineteen days following PTB knockdown.** (A) Immunostaining of the trans-differentiated cells with the EM48 antibody indicates the presence of Htt inclusions in the HD cells. Scale bar, 10  $\mu$ m. (B) Cell counting results showing the percentage of cells with aggregates in the nucleus or non-nuclear regions (soma and/or neuropil). Data are shown as mean  $\pm$  SD; \* $p$ <0.001.  $n$ =3. doi:10.1371/journal.pone.0109621.g003

commonly used as a neuron-specific marker for mature neurons [22]. We thus stained the cells with a NeuN specific antibody and found that at least 10% cells were positive in NeuN expression in each of the three converted cell types after nineteen days of the reprogramming (Fig. 2A). Since one major pathological feature of HD is selective loss of GABAergic neurons in the striatum [23], we next examined whether the trans-differentiated neuron-like cells express  $\gamma$ -aminobutyric acid (GABA), an inhibitory neurotransmitter. As shown in Fig. 2B, GABA was strongly expressed in both the normal and HD neuron-like cells nineteen days after shRNA knockdown of PTB. Compared to the normal fibroblast-derived GABA-positive cells, some HD GABA-positive cells showed degenerating neurites and shrunken cell bodies (Fig. 2B, right panel). Cell counting indicates that neurodegeneration was significantly more in the HD neuron-like cells than in the normal cells (Fig. 2C). Additionally, as degenerated neurons in HD striatum are DARPP-32 positive cells [23], we examined whether

the trans-differentiated neuron-like cells are also positively stained with the protein. As shown in Figs. 2D and 2E, thirty days following the reprogramming, many cells expressed DARPP-32. At this time point, however, degenerated cells were dramatically increased to 59% and 79% in the 68Q and 86Q HD cells, respectively (Figs. 2F, 2G). Taken together, these data suggest that the HD patient fibroblasts can be trans-differentiated to GABA and DARPP-32-positive neuron-like cells and the reprogramming triggers increased cell death in the HD fibroblast-derived cells.

We next examined whether trans-differentiation of HD patient fibroblasts to neuron-like cells leads to mutant Htt aggregation. We therefore immunostained the three types of converted neuron-like cells with the well-documented EM48 Htt antibody, which selectively binds to the toxic N-terminal fragment of the mutant Htt protein [24], and then assessed the cells positive with inclusions in the nucleus, soma, and neuropil by confocal microscopy. There was no EM48-positive nuclear inclusion in

the neuron-like cells trans-converted from the normal fibroblasts, whereas most of the neuron-like cells converted from the two types of HD fibroblasts contained Htt inclusions in their nuclei and non-nuclear regions (soma and neuropils) (Figs. 3A, 3B). These results indicate that the mutant Htt proteins preferentially form aggregates in both the nucleus and non-nuclear regions upon conversion to neuron-like cells.

One interesting observation from this research is that direct conversion of HD patient fibroblasts to neuron-like cells leads to abnormal neurite outgrowth and branching, characterized by frequently short or thin neurite outgrowth. This is in accordance with a previous *in vivo* study, in which abnormal dendritic arbors and increased dendritic branching in spiny striatal neurons were identified in post-mortem HD patients' brain sections [25]. Although it remains unclear why the HD neuron-like cells selectively exhibit this dysmorphic alteration, mutant Htt-caused intracellular trafficking dysfunction may be, at least partially, responsible for abnormal neurite outgrowth and branching [26]. Additionally, mutant Htt also impairs mitochondrial integrity [27] and disrupts production and trafficking of neurotrophic factors [28], which may also affect neurite outgrowth and branching. As a

further direction, it is interesting to explore the biological significance underlying this dysmorphic alteration. In addition to showing increased cell death, the directly trans-converted HD cells also form aggregates not only in the nucleus but also in non-nuclear regions such as neuropils, which is in accordance with previous *in vivo* studies using HD patient brain tissues [29]. Thus, the directly converted neuron-like cells from HD fibroblasts provide a reliable model for studying pathogenic mechanisms of HD and may be a useful tool for validation of therapeutic target or drugs in the future.

## Acknowledgments

We would like to thank Dr. Fran Day at the Imaging Core Facility of the University of South Dakota for assistance in confocal microscopy.

## Author Contributions

Conceived and designed the experiments: YL HW. Performed the experiments: YL YX SR HW. Analyzed the data: YL HW. Contributed reagents/materials/analysis tools: XDF KR DZ. Wrote the paper: YL HW.

## References

1. The-Huntington-disease-collaborative-research-group (1993) A novel gene containing a trinucleotide repeat that is expanded and unstable on Huntington's disease chromosomes. The Huntington's Disease Collaborative Research Group. *Cell* 72: 971–983.
2. Li SH, Li XJ (2004) Huntingtin and its role in neuronal degeneration. *Neuroscientist* 10: 467–475.
3. Reiner A, Albin RL, Anderson KD, D'Amato CJ, Penney JB, et al. (1988) Differential loss of striatal projection neurons in Huntington disease. *Proc Natl Acad Sci U S A* 85: 5733–5737.
4. Wyttenbach A, Swartz J, Kita H, Thykjaer T, Carmichael J, et al. (2001) Polyglutamine expansions cause decreased CRE-mediated transcription and early gene expression changes prior to cell death in an inducible cell model of Huntington's disease. *Hum Mol Genet* 10: 1829–1845.
5. Sipione S, Cattaneo E (2001) Modeling Huntington's disease in cells, flies, and mice. *Mol Neurobiol* 23: 21–51.
6. Park IH, Arora N, Huo H, Maherali N, Ahfeldt T, et al. (2008) Disease-specific induced pluripotent stem cells. *Cell* 134: 877–886.
7. Chan AW, Cheng PH, Neumann A, Yang JJ (2010) Reprogramming Huntington monkey skin cells into pluripotent stem cells. *Cell Reprogram* 12: 509–517.
8. The-HD-iPSC-Consortium (2012) Induced pluripotent stem cells from patients with Huntington's disease show CAG-repeat-expansion-associated phenotypes. *Cell Stem Cell* 11: 264–278.
9. Kaye JA, Finkbeiner S (2013) Modeling Huntington's disease with induced pluripotent stem cells. *Mol Cell Neurosci* 56: 50–64.
10. Ambasadhan R, Talantova M, Coleman R, Yuan X, Zhu S, et al. (2011) Direct reprogramming of adult human fibroblasts to functional neurons under defined conditions. *Cell Stem Cell* 9: 113–118.
11. Vierbuchen T, Ostermeier A, Pang ZP, Kokubu Y, Sudhof TC, et al. (2010) Direct conversion of fibroblasts to functional neurons by defined factors. *Nature* 463: 1035–1041.
12. Xue Y, Ouyang K, Huang J, Zhou Y, Ouyang H, et al. (2013) Direct conversion of fibroblasts to neurons by reprogramming PTB-regulated microRNA circuits. *Cell* 152: 82–96.
13. Valcarcel J, Gebauer F (1997) Post-transcriptional regulation: the dawn of PTB. *Curr Biol* 7: R705–708.
14. Boutz PL, Stoilov P, Li Q, Lin CH, Chawla G, et al. (2007) A post-transcriptional regulatory switch in polypyrimidine tract-binding proteins reprograms alternative splicing in developing neurons. *Genes Dev* 21: 1636–1652.
15. Makeyev EV, Zhang J, Carrasco MA, Maniatis T (2007) The MicroRNA miR-124 promotes neuronal differentiation by triggering brain-specific alternative pre-mRNA splicing. *Mol Cell* 27: 435–448.
16. Xue Y, Zhou Y, Wu T, Zhu T, Ji X, et al. (2009) Genome-wide analysis of PTB-RNA interactions reveals a strategy used by the general splicing repressor to modulate exon inclusion or skipping. *Mol Cell* 36: 996–1006.
17. Dong G, Ferguson JM, Duling AJ, Nicholas RG, Zhang D, et al. (2011) Modeling pathogenesis of Huntington's disease with inducible neuroprogenitor cells. *Cell Mol Neurobiol* 31: 737–747.
18. Dong G, Gross K, Qiao F, Ferguson J, Callegari EA, et al. (2012) Calretinin interacts with huntingtin and reduces mutant huntingtin-caused cytotoxicity. *J Neurochem* 123: 437–446.
19. Dong G, Callegari EA, Gloeckner CJ, Ueffing M, Wang H (2012) Prothymosin- $\alpha$  interacts with mutant huntingtin and suppresses its cytotoxicity in cell culture. *J Biol Chem* 287: 1279–1289.
20. Menezes JR, Luskin MB (1994) Expression of neuron-specific tubulin defines a novel population in the proliferative layers of the developing telencephalon. *J Neurosci* 14: 5399–5416.
21. von Bohlen Und Halbach O (2007) Immunohistological markers for staging neurogenesis in adult hippocampus. *Cell Tissue Res* 329: 409–420.
22. Lavezzi AM, Corna MF, Matturri L (2013) Neuronal nuclear antigen (NeuN): a useful marker of neuronal immaturity in sudden unexplained perinatal death. *J Neurol Sci* 329: 45–50.
23. Vonsattel JP, DiFiglia M (1998) Huntington disease. *J Neuropathol Exp Neurol* 57: 369–384.
24. Zhou H, Cao F, Wang Z, Yu ZX, Nguyen HP, et al. (2003) Huntingtin forms toxic NH2-terminal fragment complexes that are promoted by the age-dependent decrease in proteasome activity. *J Cell Biol* 163: 109–118.
25. Ferrante RJ, Kowall NW, Richardson EP Jr. (1991) Proliferative and degenerative changes in striatal spiny neurons in Huntington's disease: a combined study using the section-Golgi method and calbindin D28k immunocytochemistry. *J Neurosci* 11: 3877–3887.
26. Rong J, McGuire JR, Fang ZH, Sheng G, Shin JY, et al. (2006) Regulation of intracellular trafficking of huntingtin-associated protein-1 is critical for TrkA protein levels and neurite outgrowth. *J Neurosci* 26: 6019–6030.
27. Wang H, Lim PJ, Karbowski M, Monteiro MJ (2009) Effects of overexpression of huntingtin proteins on mitochondrial integrity. *Hum Mol Genet* 18: 737–752.
28. Ferrer I, Goutan E, Marin C, Rey MJ, Ribalta T (2000) Brain-derived neurotrophic factor in Huntington disease. *Brain Res* 866: 257–261.
29. Gutekunst CA, Li SH, Yi H, Mulroy JS, Kuemmerle S, et al. (1999) Nuclear and neuropil aggregates in Huntington's disease: relationship to neuropathology. *J Neurosci* 19: 2522–2534.
